# Supplementary material for: Recombinant Escherichia coli BL21-pET28a-egfp Cultivated with Nanomaterials in a Modified Microchannel for Biofilm Formation
Source: MDPI journal article supplement (doi:10.3390/ijms19092590), 2018-08-31
Supplement: s1 [file s1]

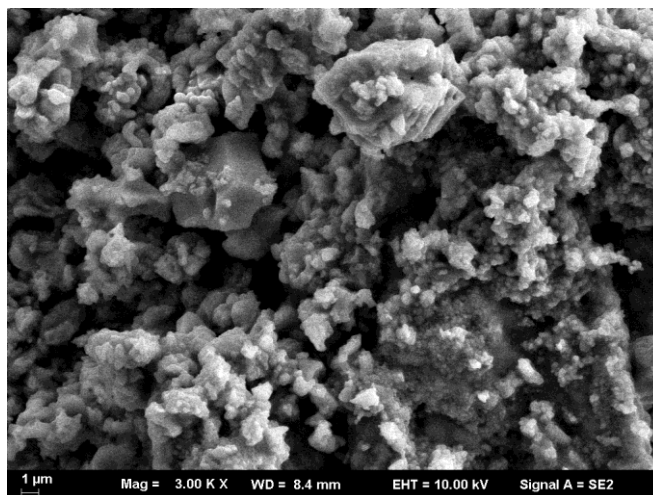

**Figure S1.** SEM photo of biofilms formed with LB medium in a microchannel reactor under single phase flow mode.
